# Supplementary material for: Efficient discovery of anticancer peptides via cost-aware ranking learning
Source: Research Square preprint supplement (doi:10.21203/rs.3.rs-8539436/v1), 2026-01-28
Supplement: Supplementary file 1 [file 8652bf7ad663b193835ba6d6.pdf]

## Supplementary Information

### Efficient discovery of anticancer peptides via cost-aware ranking learning

Jianda Yue <sup>a,b,c,d,#</sup>, Jiawei Xu <sup>a,b,c,d,#</sup>, Zihui Chen <sup>a,b,c,d</sup>, Tingting Li <sup>a,b,c,d</sup>, Zhaoyang Tang <sup>a,b,c,d</sup>, Xie Li <sup>a,b,c,d</sup>, Hua Tan <sup>a,b,c,d</sup>, Wangfei Xiang <sup>a,b,c,d</sup>, Zhonghua Liu <sup>a,b,c,d</sup>, Ying Wang <sup>a,b,c,d,\*</sup>

<sup>a</sup>The National and Local Joint Engineering Laboratory of Animal Peptide Drug Development, College of Life Sciences, Hunan Normal University, Changsha 410081, China

<sup>b</sup>Hunan Xiangjiang Laboratory, Changsha 410205, China

<sup>c</sup>Peptide and small molecule drug R&D platform, Furong Laboratory, Hunan Normal University, Changsha 410081, China

<sup>e</sup>Institute of Interdisciplinary Studies, Hunan Normal University, Changsha 410081, China

<sup>#</sup>The authors give equal contributions

<sup>\*</sup>Corresponding author

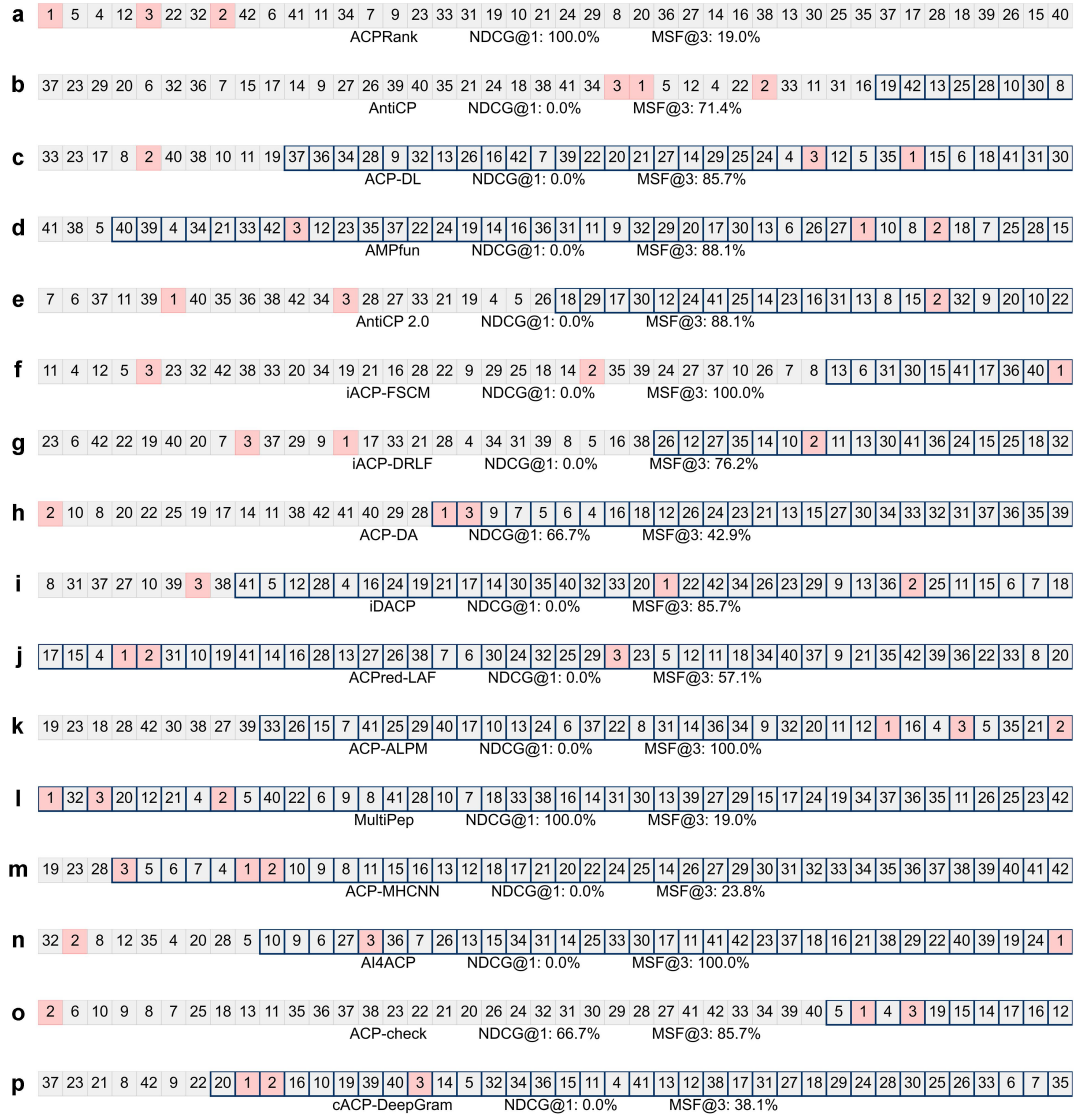

**Supplementary Fig. 1 | Visualization of ranking performance on the external rPep dataset (Part I).** The figure displays the prioritized lists generated by **(a)** ACPRank and **(b)-(p)**, 15 comparative mainstream ACP prediction models. Sequences are sorted from left to right based on the predicted probability scores output by each model. The number inside each box represents the peptide's ground-truth activity rank. Red backgrounds highlight the positions of the Top 3 elite targets. Blue-framed boxes indicate samples that were classified as non-ACPs (negative) by the specific binary decision threshold of each model.

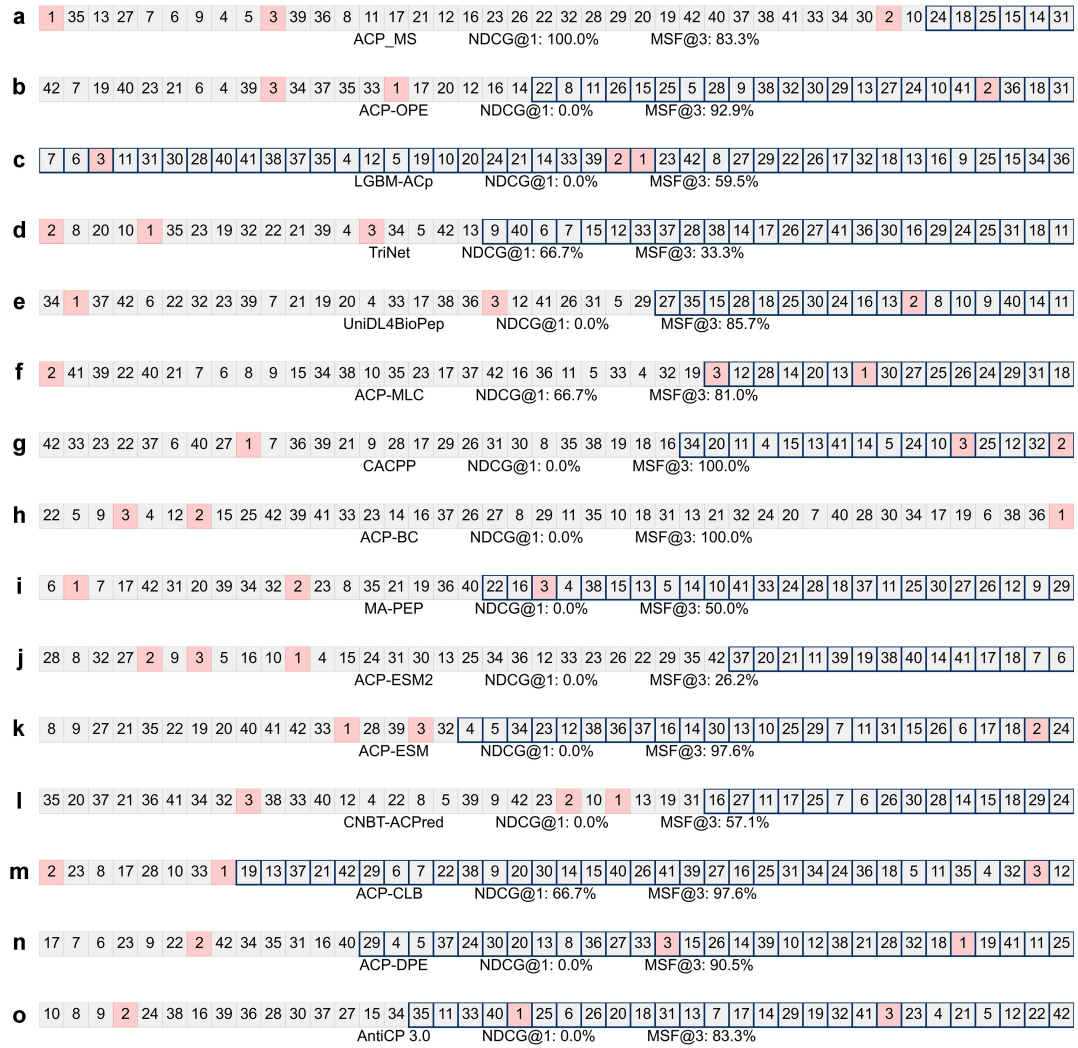

**Supplementary Fig. 2 | Visualization of ranking performance on the external rPep dataset (Part II).** This figure continues the benchmark comparison, displaying the ranking lists generated by (a)-(o), 15 additional ACP prediction models. The visualization scheme is identical to Supplementary Fig. 1.

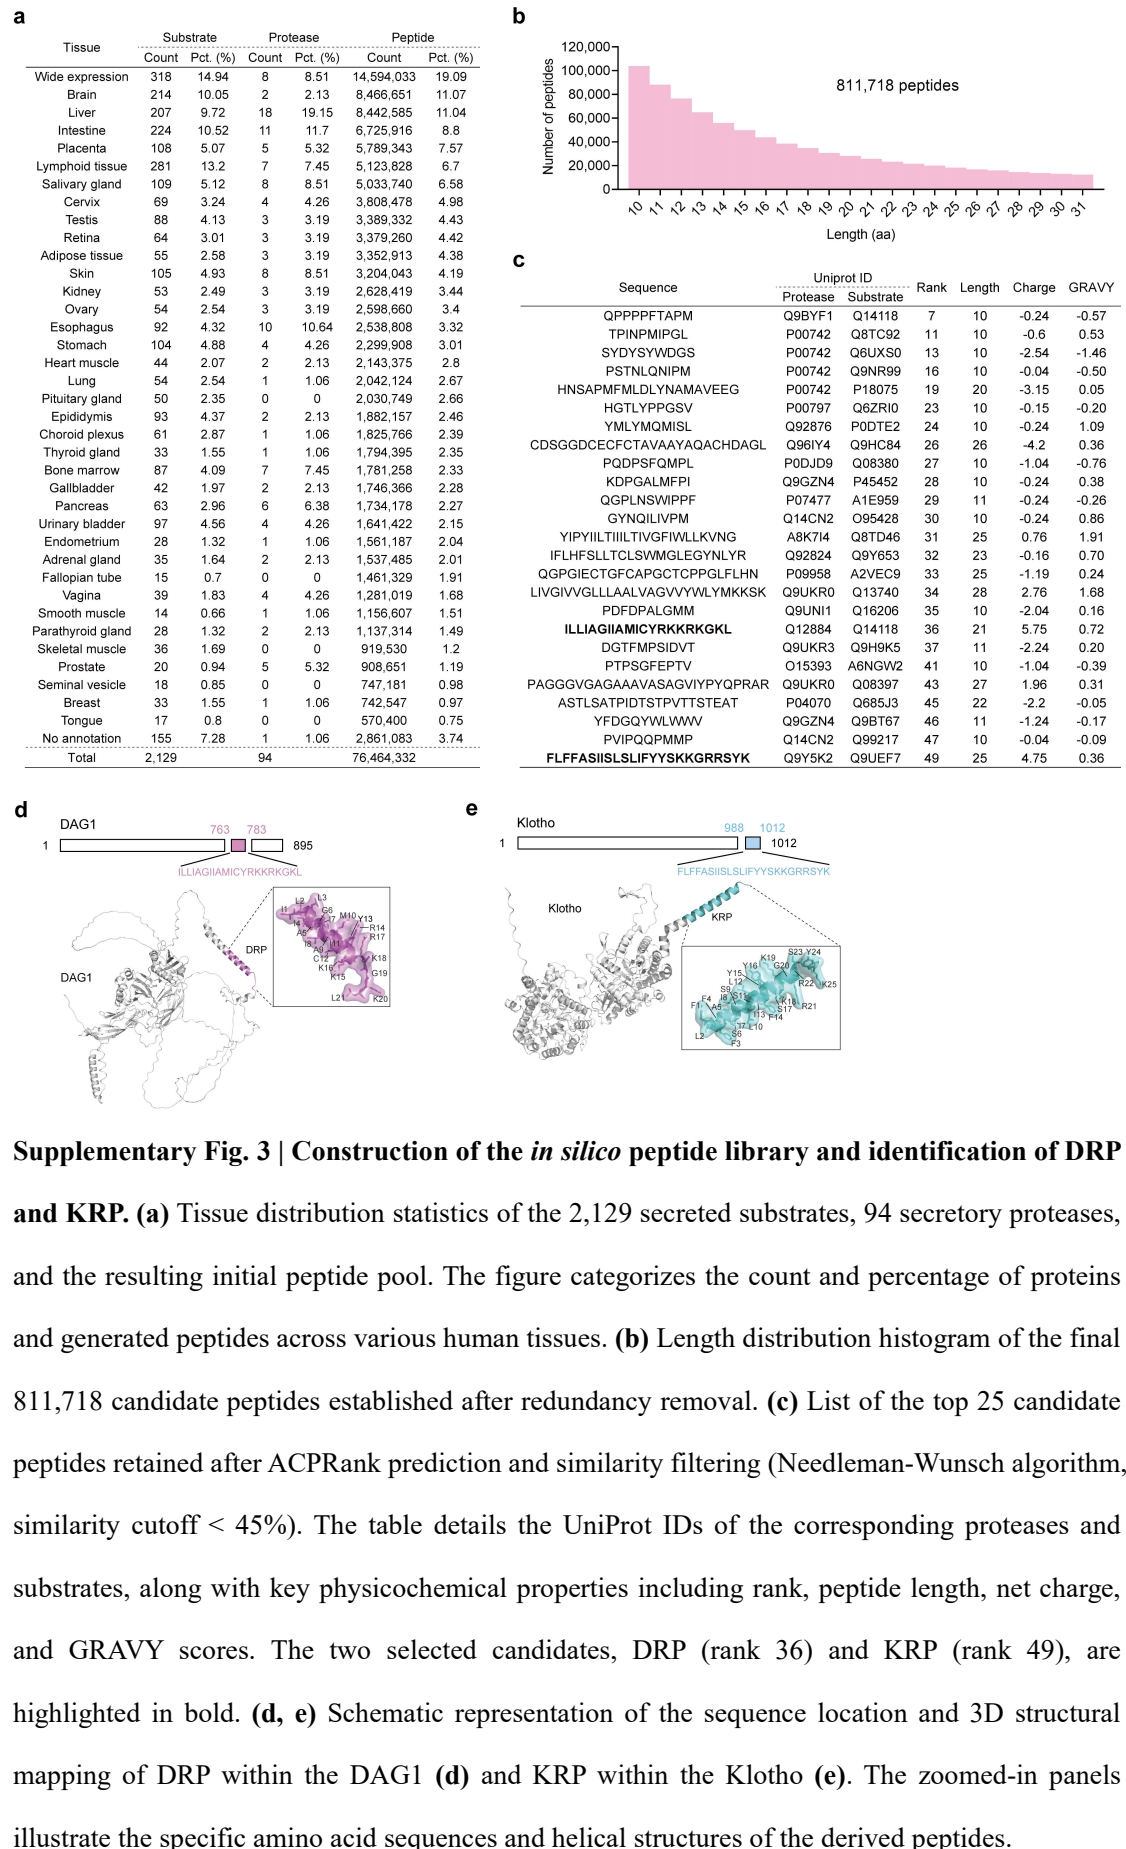

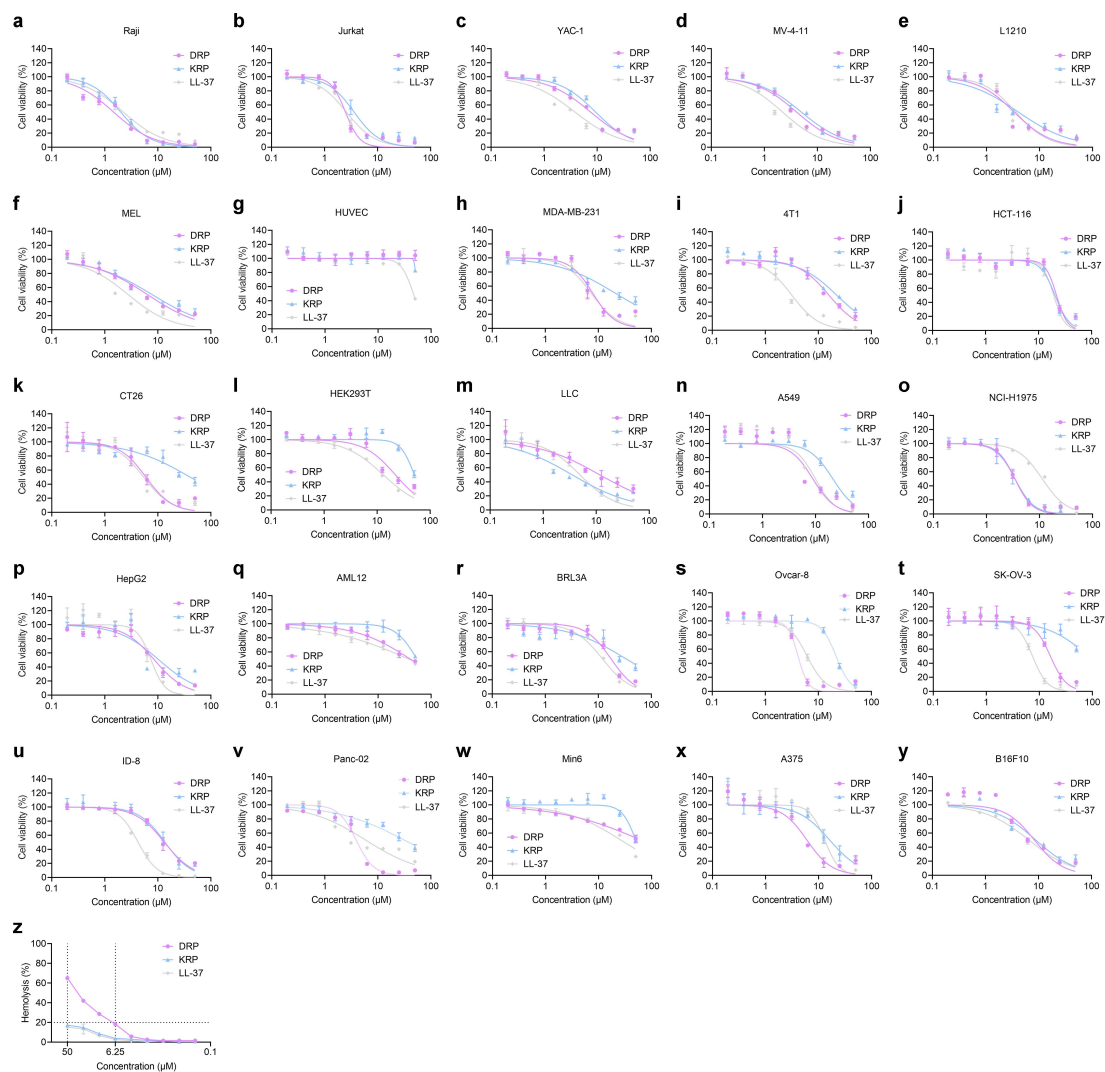

**Supplementary Fig. 4 | *In vitro* cytotoxicity and hemocompatibility profiles. (a–y)**

Dose–response curves illustrating the cell viability of 25 cell lines treated with varying concentrations of DRP, KRP, or LL-37. **(z)** Hemolysis assay of murine erythrocytes incubated with the indicated peptides.

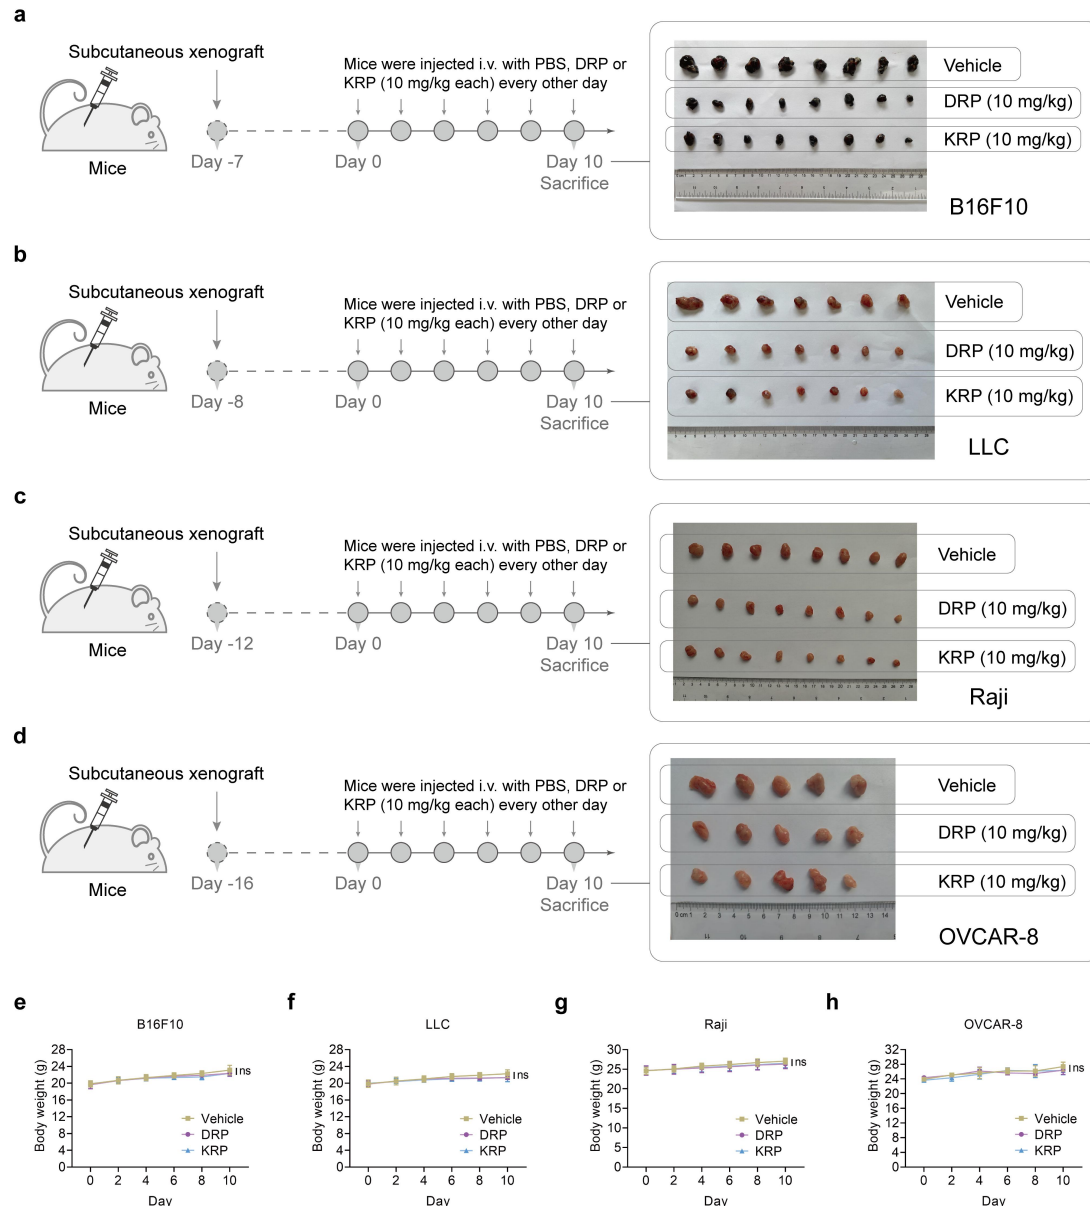

**Supplementary Fig. 5 | *In vivo* therapeutic efficacy and body weight evaluation of DRP and KRP.** (a–d) Schematic illustration of the experimental design (left) and representative photographs of excised tumors at the study endpoint (right) for B16F10 (a), LLC (b), Raji (c), and OVCAR-8 (d) xenograft models. Following tumor establishment, mice received intravenous injections of vehicle (PBS), DRP, or KRP (10 mg/kg) every other day as indicated in the timeline. (e–h) Body weight monitoring curves of B16F10 (e), LLC (f), Raji (g), and OVCAR-8 (h) tumor-bearing mice throughout the treatment course. "ns" indicates not significant.

**Supplementary Table 1 | List of unseen query sequences used in the anchor insertion stress test.**

| Peptide | Name                 | Sequence                         |
|---------|----------------------|----------------------------------|
| tPep1   | Cycloviolacin O2     | GIPCGESCVWIPCISSAIGCSCKSKVCYRN   |
| tPep2   | Cliotides T12, CT12  | GIPCGESCVYIPCTVTALLGCCKDKVCYKN   |
| tPep3   | Vitri F              | GTLPCGESCVWIPCISSVVGCAACKSKVCYKD |
| tPep4   | Mram 8               | GIPCGESCVFIPCLTSAIGCSCKSKVCYRN   |
| tPep5   | Cliotides T10, CT10  | GVPCAESCVWIPCTVTALLGCCKDKVCYLN   |
| tPep6   | FR-15                | FRRFFKWFRFFKFF                   |
| tPep7   | B9                   | GNPCGESCVYLPICITTVVGCSCQNSVCYHN  |
| tPep8   | Hymenochirin-1Pa     | LKLSPKTKDTLKKVLKGAIKGAIAIASMA    |
| tPep9   | Viphi A              | GSIPCGESCVFIPCISSVIGCAACKSKVCYKN |
| tPep10  | Hymenochirin-1B      | IKLSPETKDNLKKVLKGAIKGAIAVAKMV    |
| tPep11  | [K8R]cGm             | GCRRLCYRQRCVTYCRGR               |
| tPep12  | Viphi F              | GSIPCGESCVFIPCISAIIGCSCSSKVCYKN  |
| tPep13  | FR11P                | FRRFFKWFRFPFKFF                  |
| tPep14  | CA(1-& HECATE(11/23) | KWKLFKKALKKLKKALKKAL             |
| tPep15  | A12L                 | KWKSFLKTFKSLKKTVLHTALKAISS       |
| tPep16  | Maximin 4            | GIGGVLLSAGKAALKGLAKVLAEKYAN      |
| tPep17  | Brevinin-1H          | FALGAVTKVLPKLFCLITRKC            |
| tPep18  | Phakellistatin 7     | PPIFALPPYI                       |
| tPep19  | Hecate Ac            | FALALKALKKALKKLKKALKKAL          |
| tPep20  | Kalata B1 [N15Y]     | GLPVCGETCVGGTCYTPGCTCSWPVCTRN    |
